# Supplementary material for: Promoter engineering enables overproduction of foreign proteins from a single copy expression cassette in Bacillus subtilis
Source: PubMed Central journal article supplement (PMC6570832; doi:10.1186/s12934-019-1159-0), 2019-06-14
Supplement: 12934_2019_1159_MOESM1_ESM.pdf [file 12934_2019_1159_MOESM1_ESM.pdf]

## Additional materials

### Methods:

#### Construction of 6×His tag strains

The 6×His tag was fused to C-terminal of four proteins (BgaB, sfGFP, MPH and Chd) using the genome of strain WBSBgaB, WBSGFP, WBSMPH and WBSChd as template, respectively. The primers used were list in supplementary Table S1. The mutant strains were named as WBSBgaBH, WBSGFPH, WBSMPHH and WBSChdH.

#### Western blot analysis

Briefly, the purified proteins were separated on 9% SDS-PAGE gels, and subsequently transferred to nitrocellulose membranes. The primary antibodies were anti-6×His rabbit antibody (Sangon Biotech, China, NO. D110002). The secondary antibodies were HRP-conjugated Mouse anti-rabbit IgG (Sangon Biotech, China, NO. D110065). The signals were detected using the Pro-Light HRP Chemiluminescent Kit (Tiangen Biotech).

#### The kinetics of bacterial growth

The kinetics of bacterial growth was described by the logistic equation [1].

$$\frac{dx}{dt} = \mu_m \left(1 - \frac{x}{x_m}\right) \quad (1)$$

$$x = \frac{x_0 x_m e^{\mu_m t}}{x_m - x_0 + x_0 e^{\mu_m t}} \quad (2)$$

#### The kinetic model for enzyme production

The kinetic model for enzyme production was described by the Luedeking-Piret equation [2].

$$\frac{dp}{dt} = \alpha \frac{dx}{dt} + \beta x \quad (3)$$

$$P = P_0 + \alpha \frac{x_0(x_m - x_0)(e^{\mu_m t} - 1)}{x_m - x_0 + x_0 e^{\mu_m t}} + \beta \frac{x_m}{\mu_m} \ln \frac{x_m - x_0 + x_0 e^{\mu_m t}}{x_m} \quad (4)$$

**Nomenclature:**

X is the biomass concentration (log<sub>10</sub> CFU/ml);  $x_0$  is the initial cell concentration;  $x_m$  is the maximum cell concentration;  $\mu_m$  is the maximum specific growth rate ( $h^{-1}$ );  $P$  is the activity of enzyme (U, U/ml or U/L).  $P_0$  is the initial activity of enzyme;  $\alpha$  is the constant for enzyme accumulation decided by the cell growth rate;  $\beta$  is the constant for enzyme accumulation decided by the cell concentration.  $R^2$  is correlation coefficients.

**Results:**

**Fig. S1** The expression pattern of BgaB in mutant strains with different promoters. **(a)** strain BS43, **(b)** strain BSsrfA, **(c)** strain BSxylA without addition of xylose, **(d)** strain BSxylA with addition of 1% xylose after cultivation of 2 h. Biomass was plotted in logarithmic scale (logarithmic scale of biomass).

**Fig. S2** The expression pattern of BgaB in mutant strains with different promoters. **(a)** strain BS43, **(b)** strain BSsrfA, **(c)** strain BSxylA without addition of xylose, **(d)** strain BSxylA with addition of 1% xylose after cultivation of 2 h. Biomass was plotted in logarithmic scale (linear scale of biomass).

**Fig. S3** The expression pattern of BgaB controlled by mutant  $P_{y1b}$ . **(a)** strain WB800, **(b)** strain 35BgaB, **(c)** strain 10BgaB, **(d)** strain 3510BgaB, **(e)** strain 351022BgaB and **(f)** strain 351016BgaB (logarithmic scale of biomass).

**Fig. S4** The expression pattern of BgaB controlled by mutant  $P_{y1b}$ . **(a)** strain WB800, **(b)** strain 35BgaB, **(c)** strain 10BgaB, **(d)** strain 3510BgaB, **(e)** strain 351022BgaB and **(f)** strain 351016BgaB (linear scale of biomass).

**Fig. S5** The expression pattern of BgaB controlled by mutant  $P_{3510}$ . **(a)** strain OBgaB, **(b)** strain JBgaB, **(c)** strain DBgaB, **(d)** strain BBgaB, **(e)** strain WBSBgaB and **(f)** strain NPBgaB (logarithmic scale of biomass).

**Fig. S6** The expression pattern of BgaB controlled by mutant *P3510*. **(a)** strain OBgaB, **(b)** strain JBgaB, **(c)** strain DBgaB, **(d)** strain BBgaB, **(e)** strain WBSBgaB and **(f)** strain NPBgaB (linear scale of biomass).

**Fig. S7** The expression pattern of sfGFP in mutant strains using *P<sub>ylb</sub>* **(a)** and *NBP3510* **(b)**. **(a)** strain WBGFP, **(b)** strain WBSGFP (logarithmic scale of biomass).

**Fig. S8** The expression pattern of sfGFP in mutant strains using *P<sub>ylb</sub>* **(a)** and *NBP3510* **(b)**. **(a)** strain WBGFP, **(b)** strain WBSGFP (linear scale of biomass).

**Fig. S9** The control of MPH **(a)** and Chd **(b)** expression in strain WB800. Biomass was plotted in logarithmic scale.

**Fig. S10** The control of MPH **(a)** and Chd **(b)** expression in strain WB800. Biomass was plotted in linear scale.

**Fig. S11** Purification of BgaB and sfGFP

**Fig. S12** Purification of MPH and Chd

**Fig. S13** Verification of BgaB, sfGFP, MPH and Chd by western blot

**Fig. S14** The kinetics of bacterial growth. **(a)** strain WB800, **(b)** strain WBBgaB, **(c)** strain 35BgaB, **(d)** strain 10BgaB, **(e)** strain 3510BgaB, **(f)** strain 351022BgaB and **(g)** strain 351016BgaB.

**Fig. S15** The kinetics of bacterial growth. **(a)** strain OBgaB, **(b)** strain JBgaB, **(c)** strain DBgaB, **(d)** strain BBgaB, **(e)** strain WBSBgaB and **(f)** strain NP3510BgaB.

**Fig. S16** The kinetics of bacterial growth. **(a)** strain WB800, **(b)** strain WBSMPH and **(c)** strain WBSChd.

**Fig. S17** The kinetic model for BgaB production in mutant strains. **(a)** strain WBBgaB, **(b)** strain WBSBgaB.

**Table S1** Primers used in this study

**Table S2** the parameters in the kinetics of bacterial growth

**Table S3** the parameters in the kinetics of BgaB production

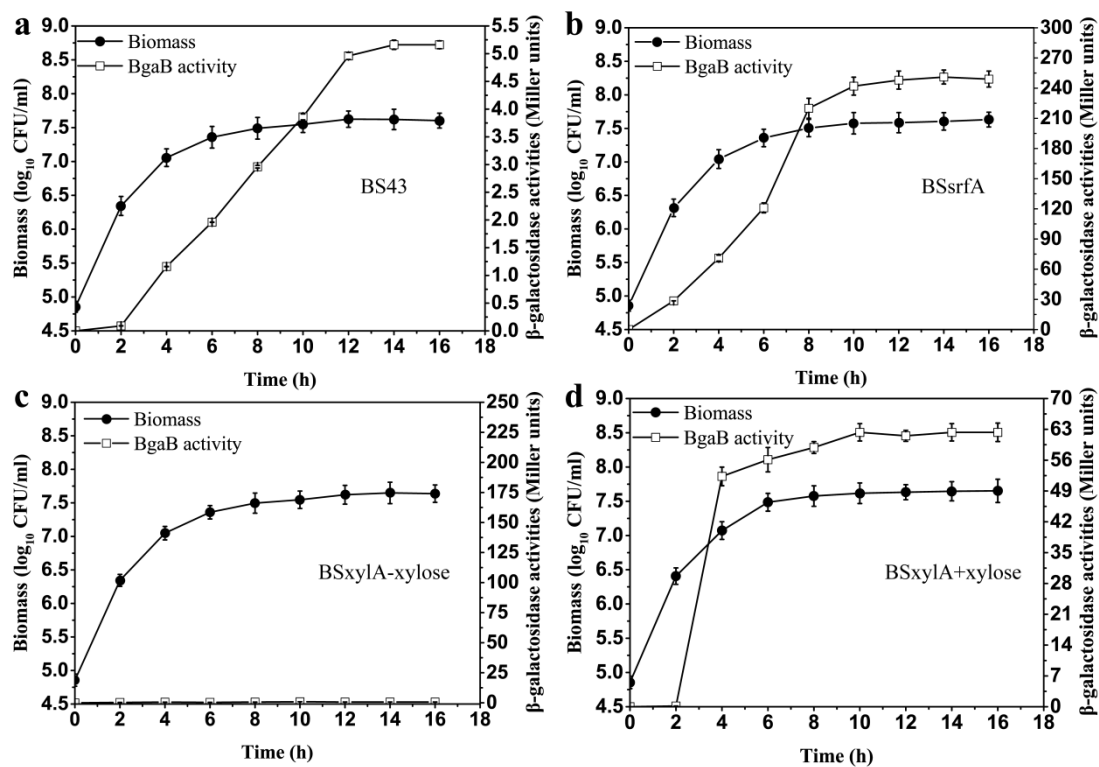

**Fig. S1** The expression pattern of BgaB in mutant strains with different promoters. **(a)** strain BS43, **(b)** strain BSsrfA, **(c)** strain BSxylA without addition of xylose, **(d)** strain BSxylA with addition of 1% xylose after cultivation of 2 h. Biomass was plotted in logarithmic scale.

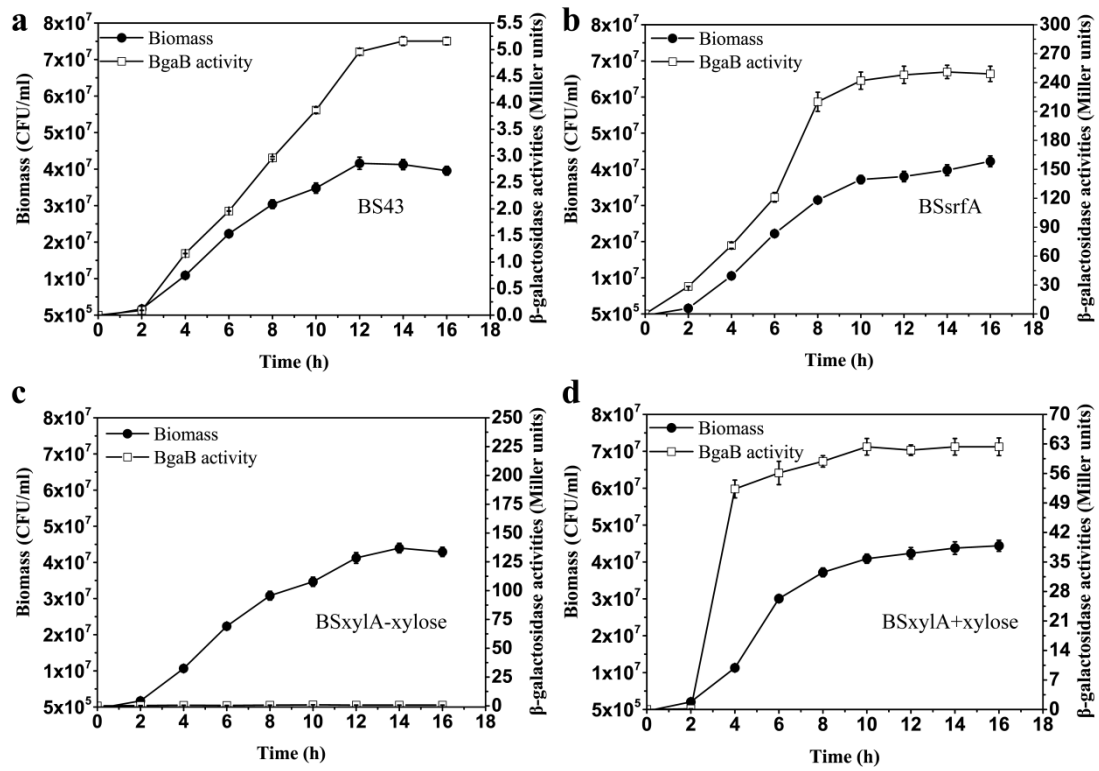

**Fig. S2** The expression pattern of BgaB in mutant strains with different promoters. **(a)** strain BS43, **(b)** strain BSsrfA, **(c)** strain BSxylA without addition of xylose, **(d)** strain BSxylA with addition of 1% xylose after cultivation of 2 h. Biomass was plotted in linear scale.

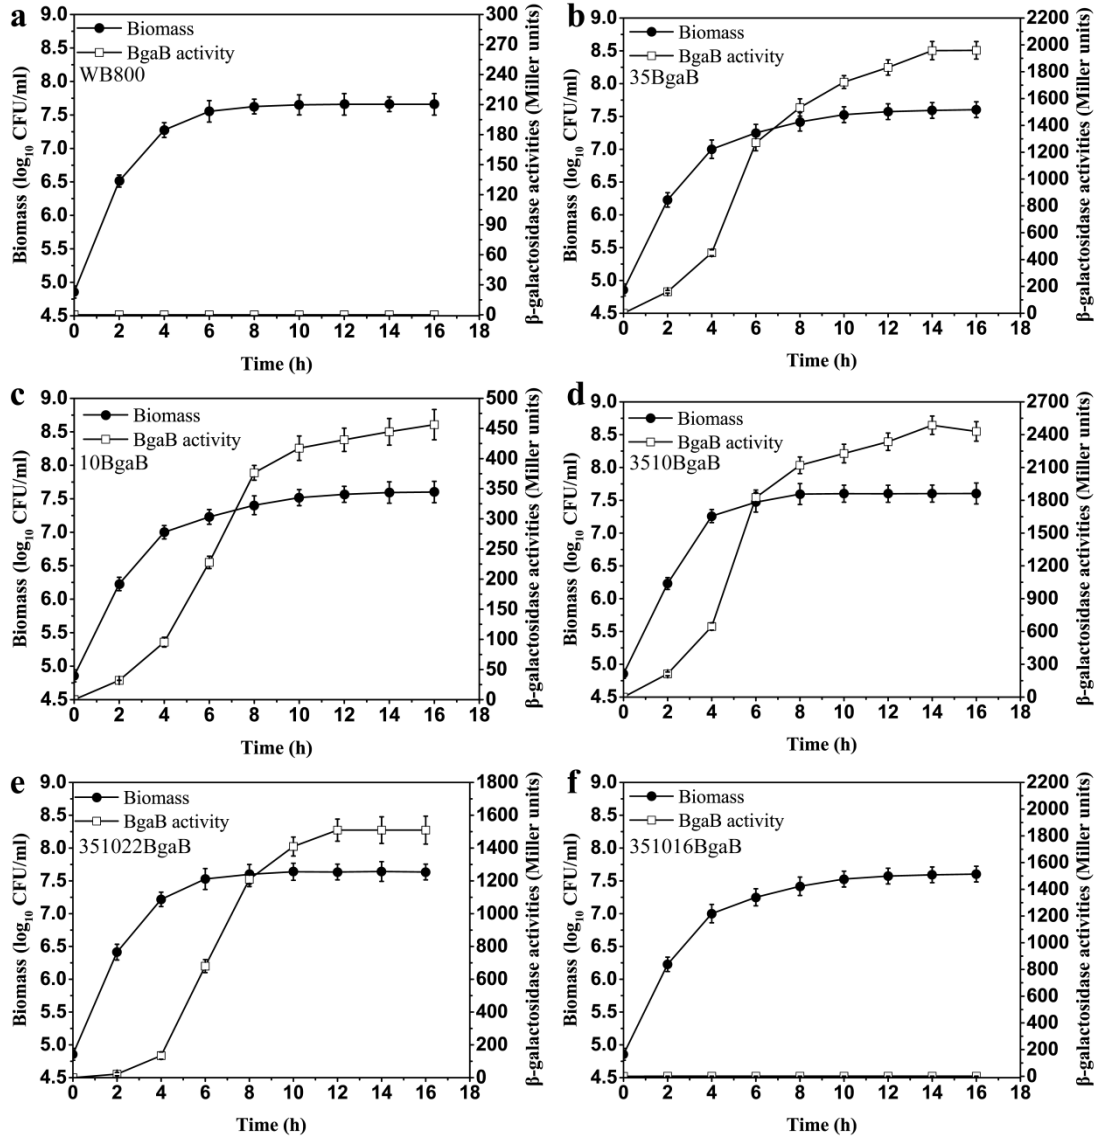

**Fig. S3** The expression pattern of BgaB controlled by mutant  $P_{yIb}$ . **(a)** strain WB800, **(b)** strain 35BgaB, **(c)** strain 10BgaB, **(d)** strain 3510BgaB, **(e)** strain 351022BgaB and **(f)** strain 351016BgaB. Biomass was plotted in logarithmic scale.

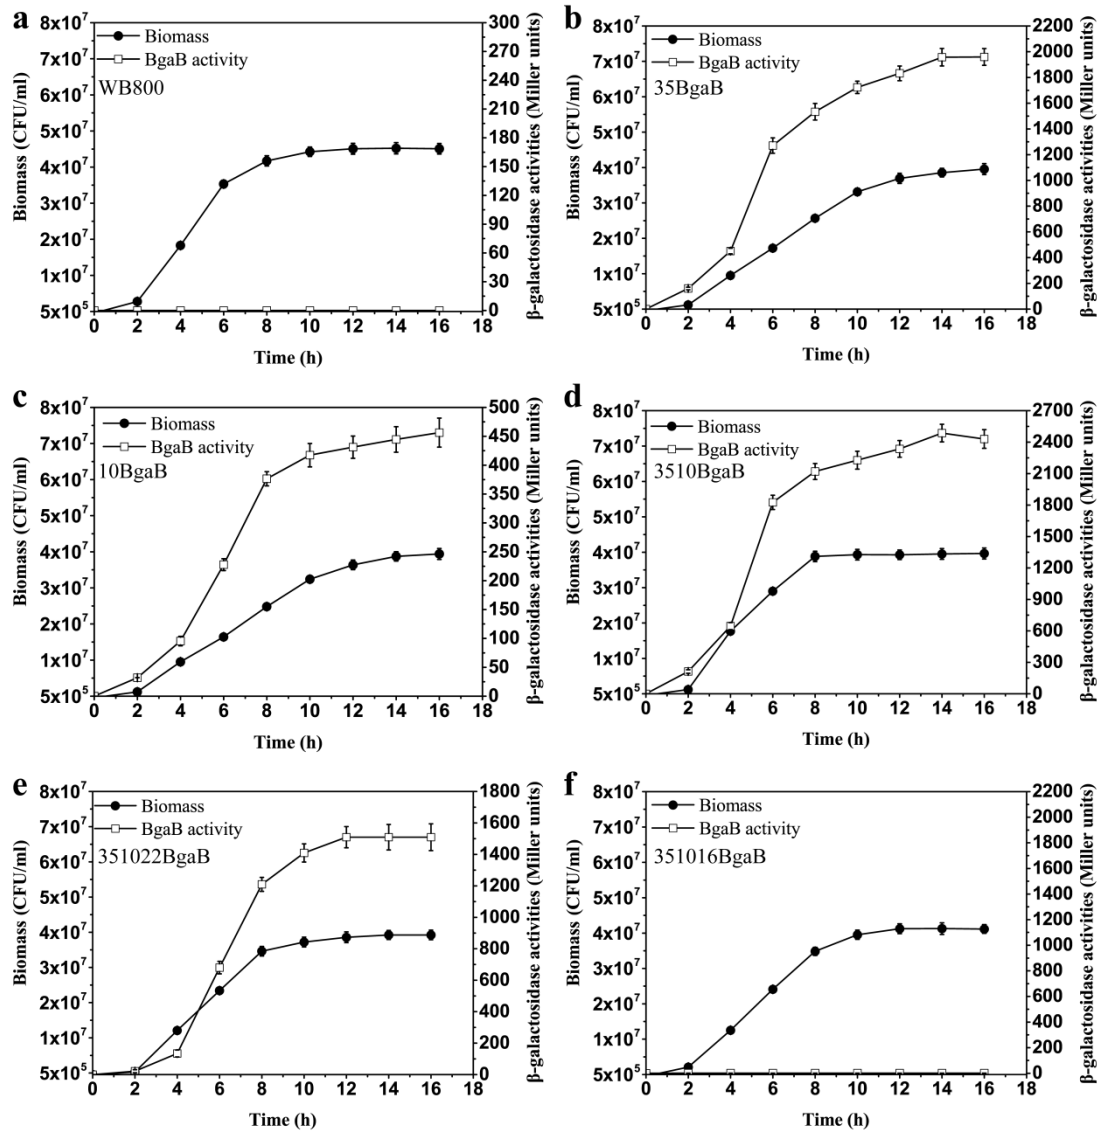

**Fig. S4** The expression pattern of BgaB controlled by mutant  $P_{yIb}$ . **(a)** strain WB800, **(b)** strain 35BgaB, **(c)** strain 10BgaB, **(d)** strain 3510BgaB, **(e)** strain 351022BgaB and **(f)** strain 351016BgaB. Biomass was plotted in in linear scale.

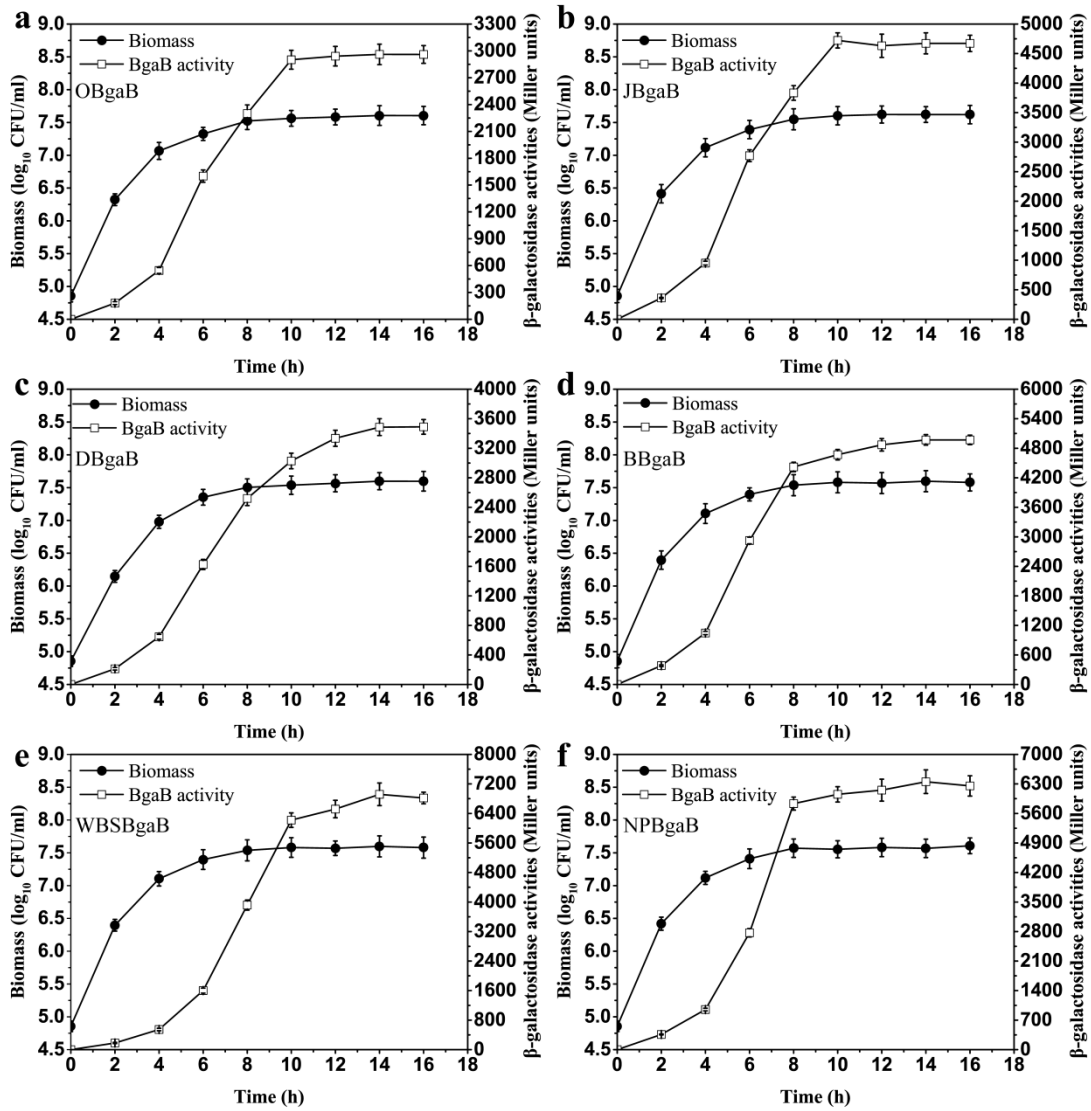

**Fig. S5** The expression pattern of BgaB controlled by mutant *P3510*. **(a)** strain OBgaB, **(b)** strain JBgaB, **(c)** strain DBgaB, **(d)** strain BBgaB, **(e)** strain WBSBgaB and **(f)** strain NPBgaB. Biomass was plotted in logarithmic scale.



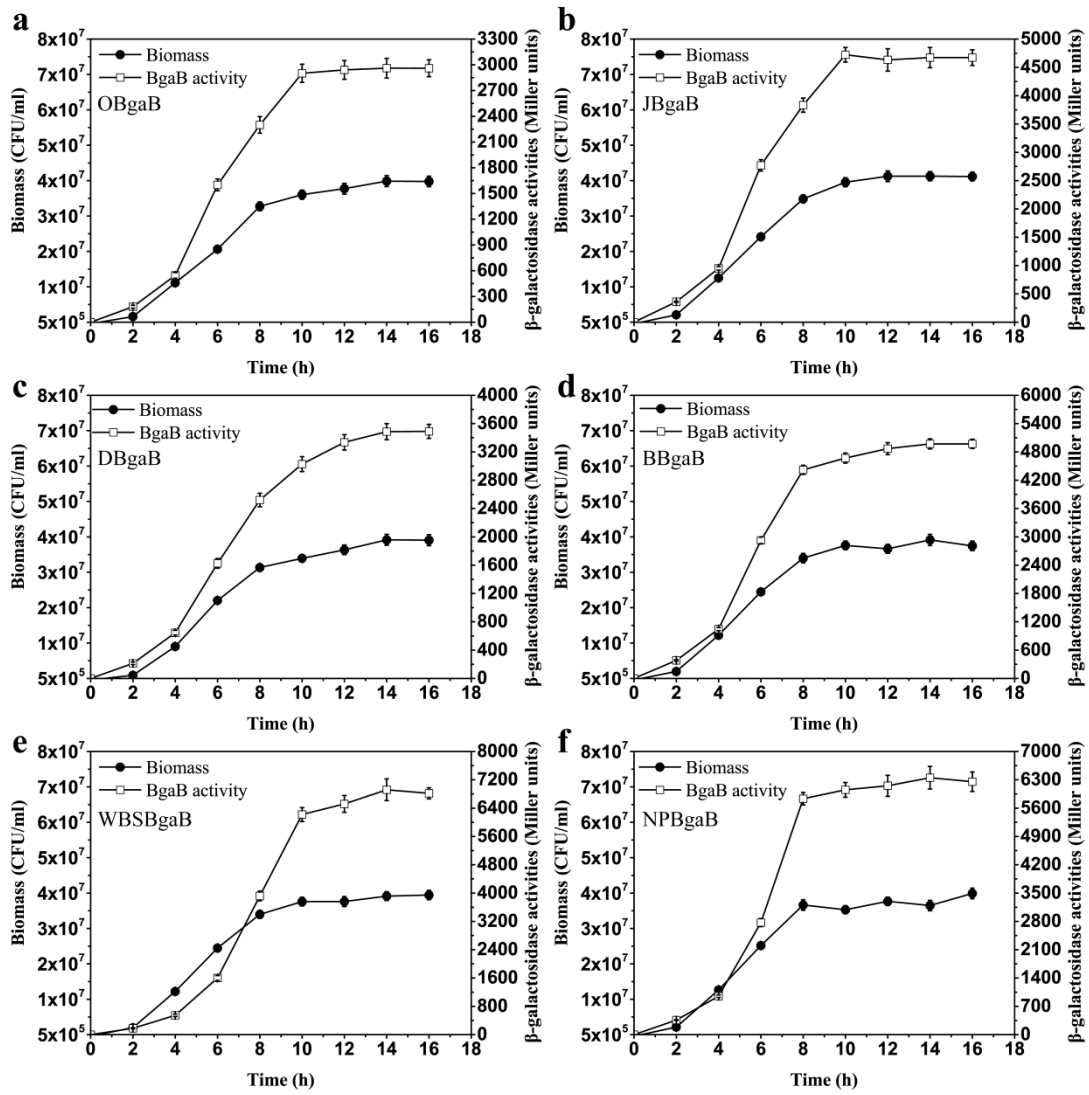

**Fig. S6** The expression pattern of BgaB controlled by mutant *P3510*. **(a)** strain OBgaB, **(b)** strain JBgaB, **(c)** strain DBgaB, **(d)** strain BBgaB, **(e)** strain WBSBgaB and **(f)** strain NPBgaB. Biomass was plotted in linear scale.

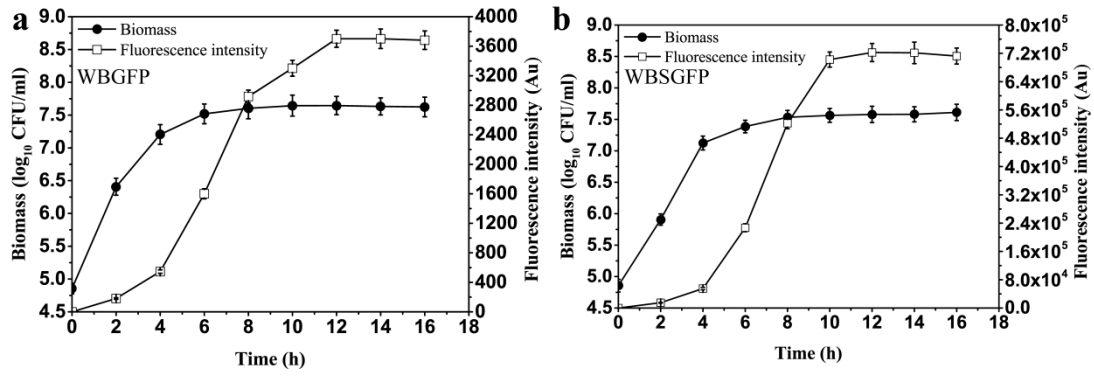

**Fig. S7** The expression pattern of sfGFP in mutant strains using *P<sub>ylb</sub>* (a) and *NBP3510* (b). (a) strain WBGFP, (b) strain WBSGFP. Biomass was plotted in logarithmic scale.

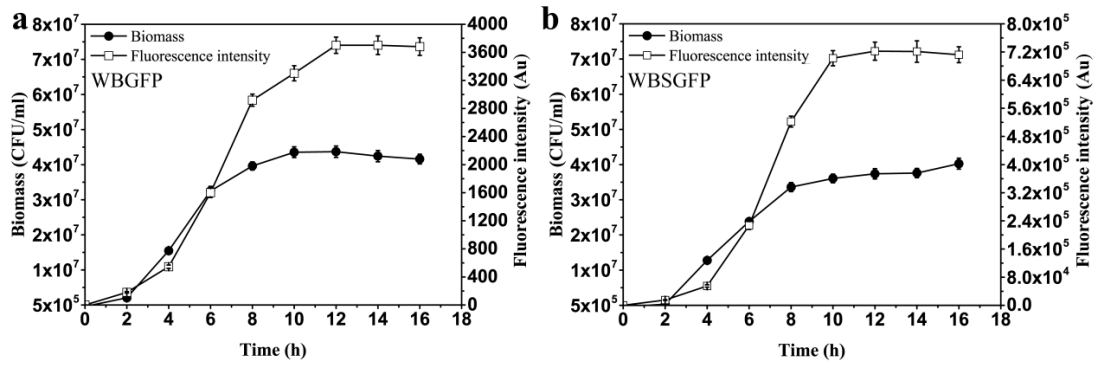

**Fig. S8** The expression pattern of sfGFP in mutant strains using *P<sub>ylb</sub>* (a) and *NBP3510* (b). (a) strain WBGFP, (b) strain WBSGFP. Biomass was plotted in linear scale.

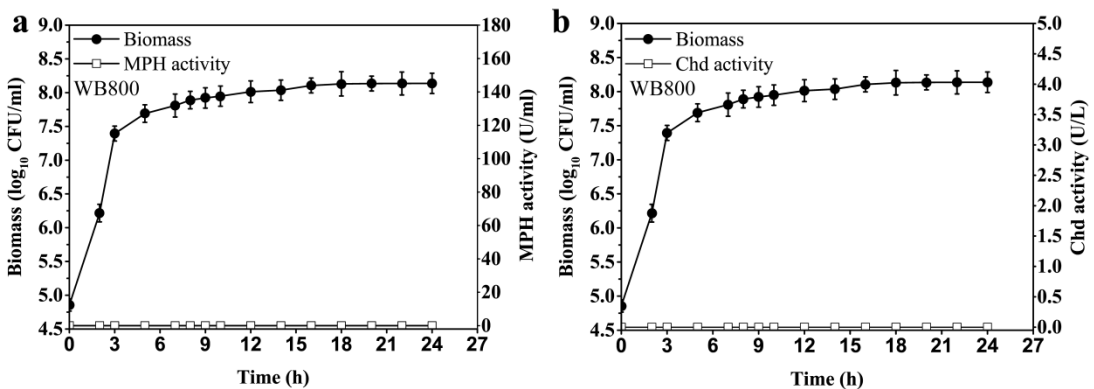

**Fig. S9** The control of MPH (a) and Chd (b) expression in strain WB800. Biomass was plotted in logarithmic scale.

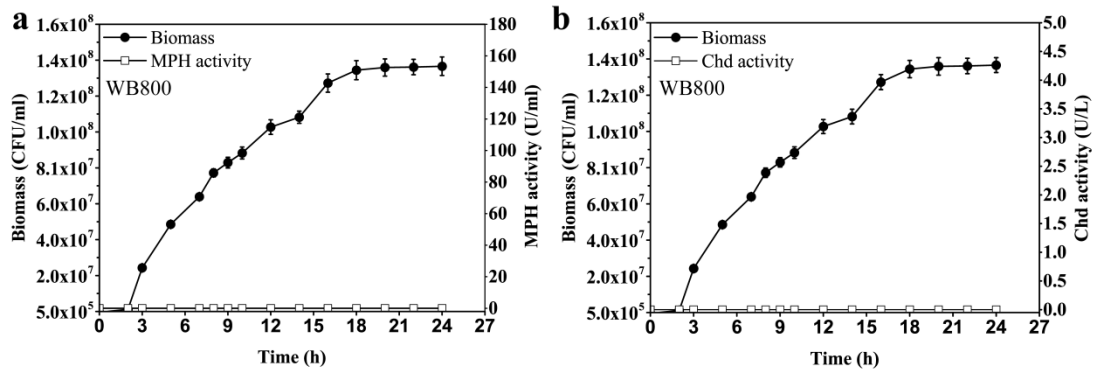

**Fig. S10** The control of MPH (a) and Chd (b) expression in strain WB800. Biomass was plotted in linear scale.

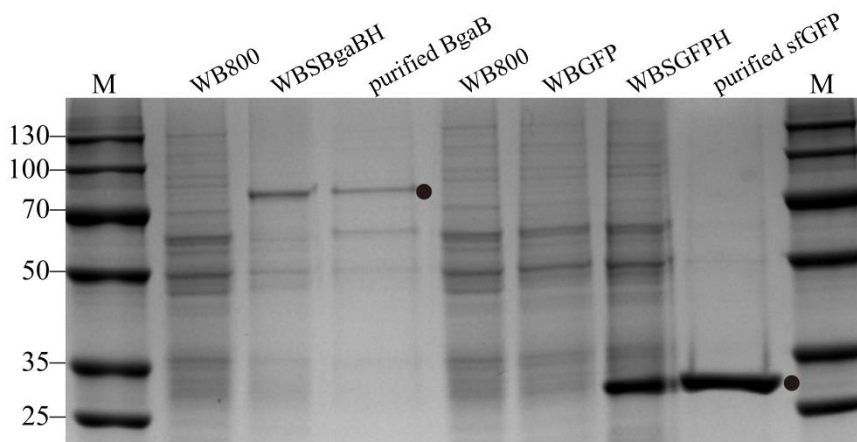

**Fig. S11** Purification of BgaB and sfGFP. The bands indicating to BgaB and sfGFP were marked. WB800 represents the intracellular proteins of strain WB800.

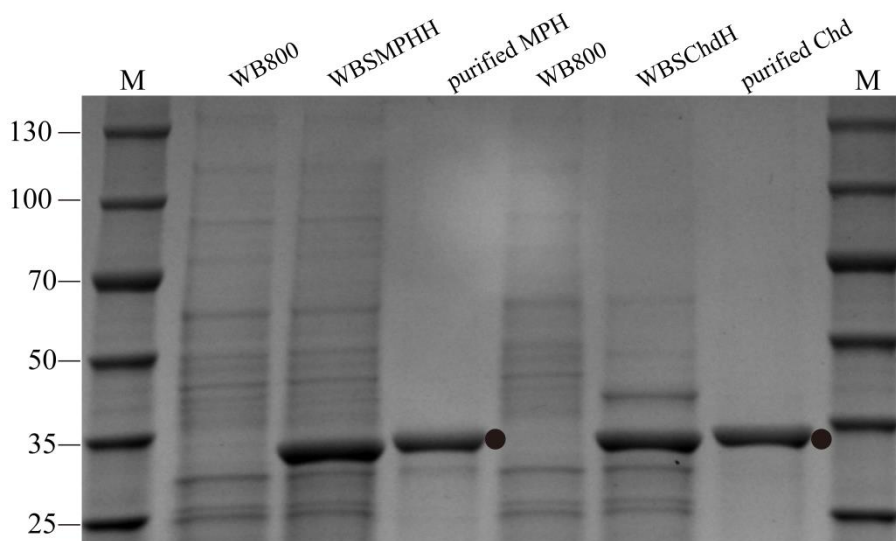

**Fig. S12** Purification of MPH and Chd. The bands indicating to MPH and Chd were marked. WB800 represents the extracellular proteins of strain WB800.

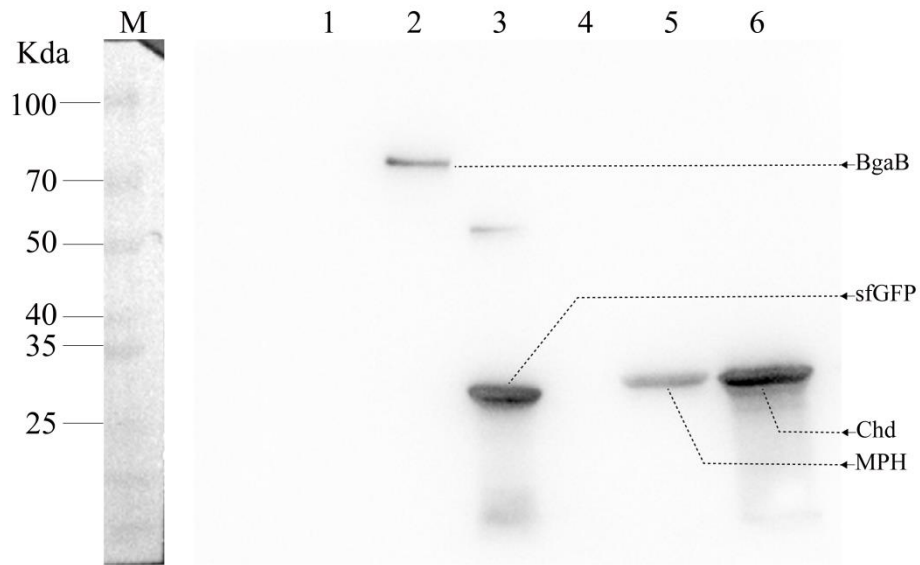

**Fig. S13** Verification of BgaB (Lane 2), sfGFP (Lane 3), MPH (Lane 5) and Chd (Lane 6) by western blot. M, Marker. Lane 1, intracellular proteins of strain WB800. Lane 2, purified BgaB. Lane 3, purified sfGFP. Lane 4, extracellular proteins of strain WB800. Lane 5, purified MPH. Lane 6, purified Chd.

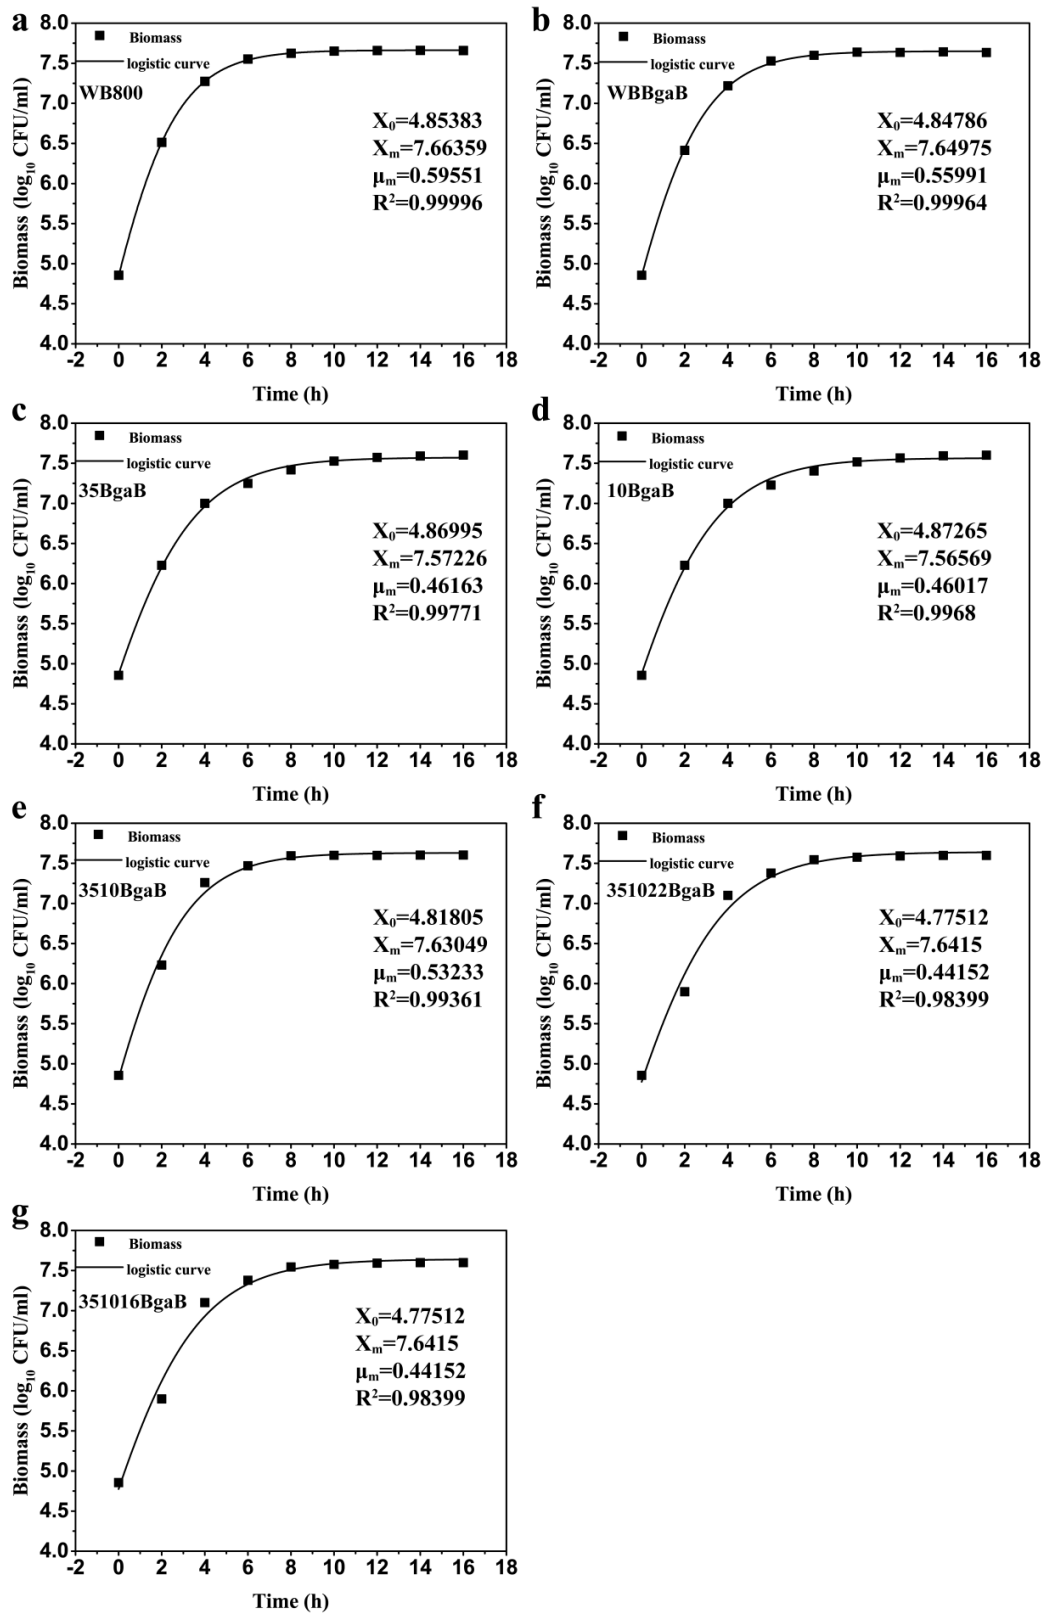

**Fig. S14** The kinetics of bacterial growth. (a) strain WB800, (b) strain WBBgaB, (c) strain 35BgaB, (d) strain 10BgaB, (e) strain 3510BgaB, (f) strain 351022BgaB and (g) strain 351016BgaB.

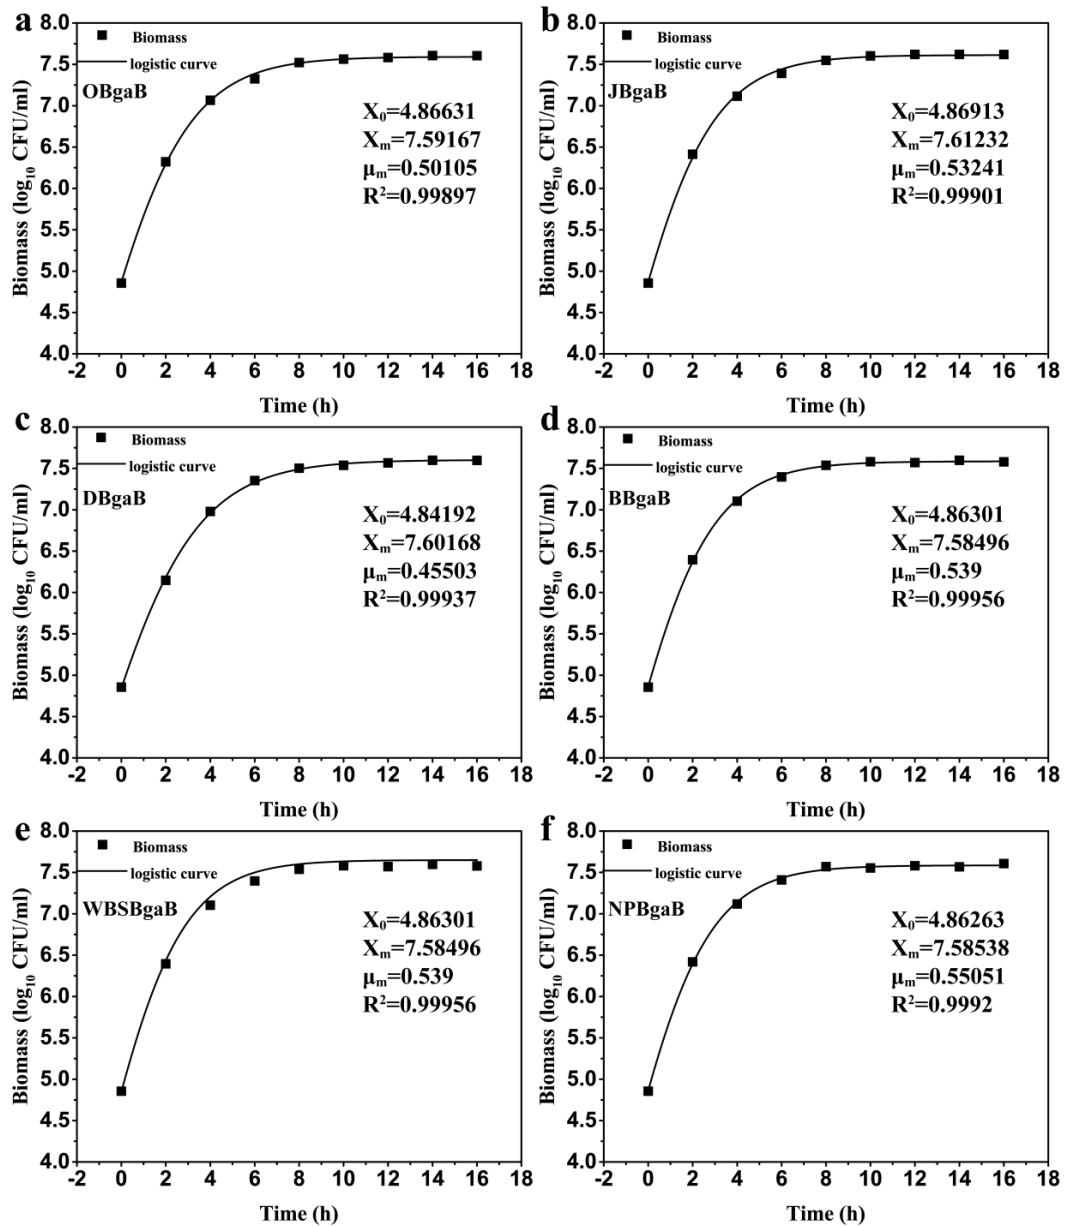

**Fig. S15** The kinetics of bacterial growth. **(a)** strain OBgaB, **(b)** strain JBgaB, **(c)** strain DBgaB, **(d)** strain BBgaB, **(e)** strain WBSBgaB and **(f)** strain NP3510BgaB.

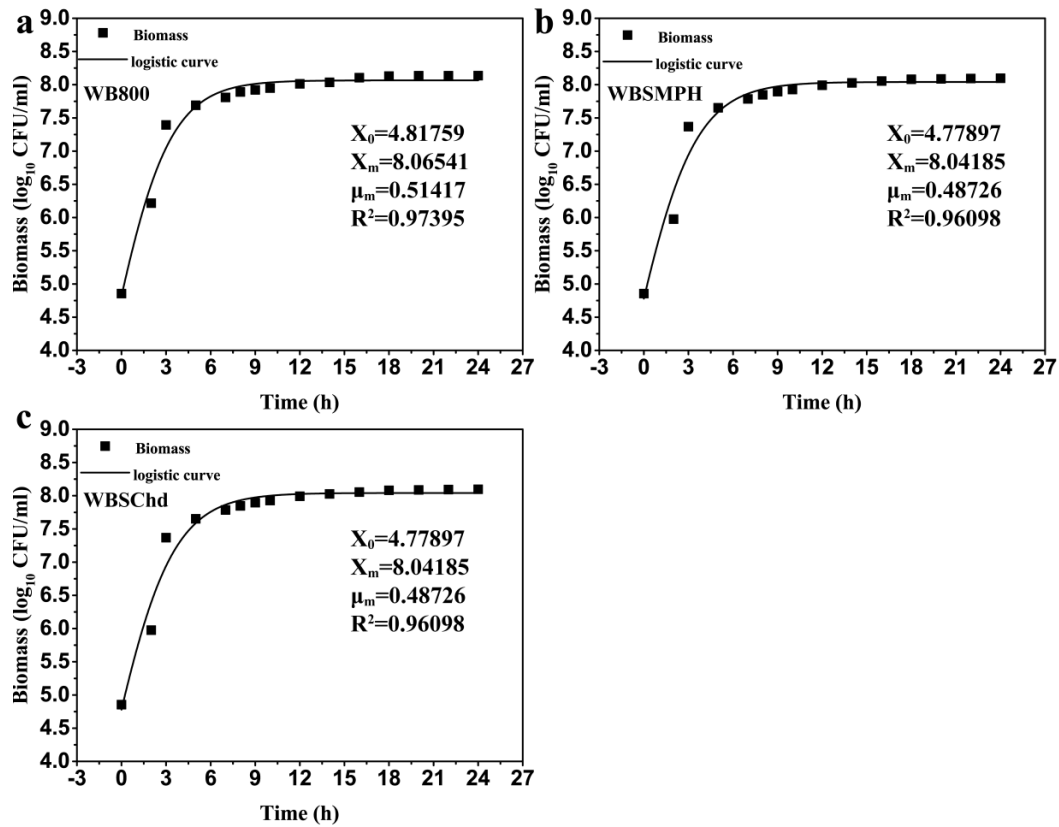

**Fig. S16** The kinetics of bacterial growth. (a) strain WB800, (b) strain WBSMPH and (c) strain WBSChd.

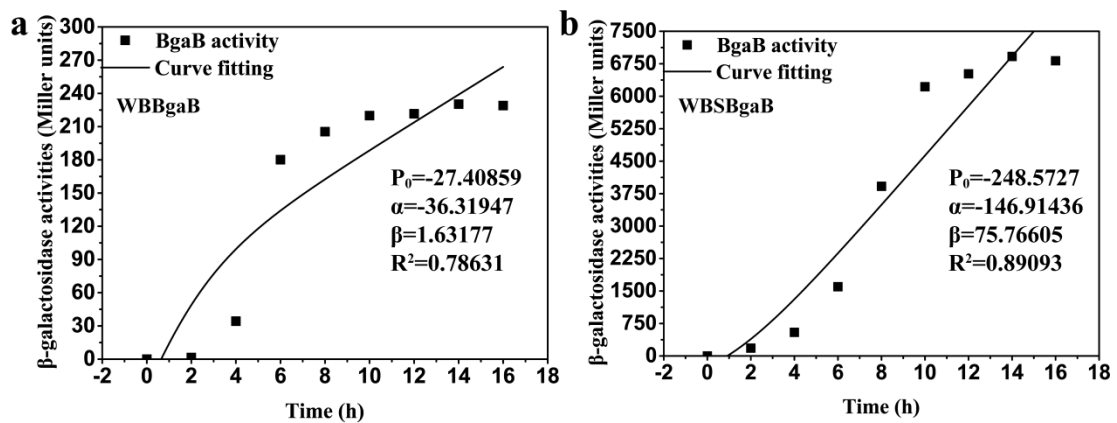

**Fig. S17** The kinetic model for BgaB production in mutant strains. (a) strain WBBgaB, (b) strain WBSBgaB.

Table S1 Primers used in this study

| Primers | Sequence (5' to 3')                            | Purpose                                             |
|---------|------------------------------------------------|-----------------------------------------------------|
| P1      | tgttgacaaaggtagaacgtatgaatgtgtatcctcaattg      | Amplification of promoter <i>P<sub>ylb</sub></i>    |
| P2      | tcctaacttatagggtaaacacctaaacctcccggcttcatca    | Amplification of promoter <i>P<sub>ylb</sub></i>    |
| P3      | ttgtgctagaggatcaacttctcaagatcccatgtgc          | Amplification of <i>bgaB</i> gene                   |
| P4      | caaattgaggataaacacattcatagcttctacctttgtcaaca   | Amplification of <i>bgaB</i> gene                   |
| P5      | gtgtaccctataagtttagga                          | Amplification of pAX01 backbone                     |
| P6      | tgatcctctagcacaaaagaa                          | Amplification of pAX01 backbone                     |
| P7      | gcatccgacattcgatcattaca                        | upstream primer                                     |
| P8      | acatgggatcttggagaagtttctatgagtcgcttttga        | marker-free strain WBBgaB construction              |
| P9      | tacaaaagcgactcatagaaacttctcaagatcccatgt        | marker-free strain WBBgaB construction              |
| P10     | ttcgatggctttttgaacatca                         | downstream primer                                   |
| P11     | tacaaaagcgactcatagaatgatagtggtatgttttcg        | Amplification of promoter <i>P<sub>43</sub></i>     |
| P12     | attgaggataaacattcatgcgtacattcctcttaccca        | Amplification of promoter <i>P<sub>43</sub></i>     |
| P13     | tacaaaagcgactcatagaattacattgtaatcatgctc        | Amplification of promoter <i>P<sub>xyIA</sub></i>   |
| P14     | attgaggataaacattcatgtgattccccctaaaaataaattc    | Amplification of promoter <i>P<sub>xyIA</sub></i>   |
| P15     | tacaaaagcgactcatagaagacgctcttcgcaagggtgt       | Amplification of promoter <i>P<sub>srfA</sub></i>   |
| P16     | attgaggataaacattcatattgtcatacctcccctaate       | Amplification of promoter <i>P<sub>srfA</sub></i>   |
| P17     | cgaaaacataccacctatcattctatgagtcgcttttga        | marker-free strain BS43 construction                |
| P18     | tgggtaagagaggaatgtacgcatgaatgtgtatcctcaat      | marker-free strain BS43 construction                |
| P19     | gacatgattacaatgtaattctatgagtcgcttttga          | marker-free strain BS <sub>xyIA</sub> construction  |
| P20     | gaattatttttaaggggaaatcacatgaatgtgtatcctcaat    | marker-free strain BS <sub>xyIA</sub> construction  |
| P21     | acacccttgcaagagcgtcttctatgagtcgcttttga         | marker-free strain WBS <sub>srfA</sub> construction |
| P22     | gattaggggaggtatgacaatatgaatgtgtatcctcaat       | marker-free strain WBS <sub>srfA</sub> construction |
| P23     | taaagcgtttattaaaaatgcaaatattaaactttaatttaagc   | marker-free strain 35BgaB construction              |
| P24     | gcttaaaattaaagtttaaatattgacatttttaataaagcgttta | marker-free strain 35BgaB construction              |
| P25     | ctttgtgtttctacatatattataaacgctttattaaaaatgt    | marker-free strain 10BgaB construction              |



---

|     |                                                           |                                                |
|-----|-----------------------------------------------------------|------------------------------------------------|
| P26 | acattttaataaaagcgtttataatataatgtagaaacaacaag              | marker-free strain 10BgaB construction         |
| P27 | ttgtgtttctacatatattataaacgctttatftaaatgtcaaatftaaactt     | marker-free strain 3510BgaB construction       |
| P28 | aagtftaaatattgacattfttaataaaagcgtttataatataatgtagaaacaaca | marker-free strain 3510BgaB construction       |
| P29 | ctcccccttgggtttctacatatattataaacctfttftaaatgtcaaat        | marker-free strain 351016BgaB construction     |
| P30 | attgacattfttaataaaagatgtataatataatgtagaaacaacaaggggag     | marker-free strain 351016BgaB construction     |
| P31 | acatatattataaacgcttccctaaatgtcaaatftaaac                  | marker-free strain 351022BgaB construction     |
| P32 | gtftaaatattgacattfttaggaaagcgtttataatataatg               | marker-free strain 351022BgaB construction     |
| P33 | caaatattatgacacaaaaagcgcagcatgggatcttgagaagtgttatcg       | marker-free strain OBgaB construction          |
| P34 | tccatgctgcgctftttgtgtcataatattggatftftaaataaagcgtt        | marker-free strain OBgaB construction          |
| P35 | caaatattftttgaagaataactaaggatgggatcttgagaagtgttatcg       | marker-free strain JBgaB construction          |
| P36 | tccatccttagtattctcaaaaaatattggatftftaaataaagcgtt          | marker-free strain JBgaB construction          |
| P37 | caaaactftftaaagaatacctcgcagcatgggatcttgagaagtgttatcg      | marker-free strain DBgaB construction          |
| P38 | tccatcgaggatattctftaaaaagattttggatftftaaataaagcgtt        | marker-free strain DBgaB construction          |
| P39 | caaatattftftaaaaaatctataaatgggatcttgagaagtgttatcg         | marker-free strain BBgaB construction          |
| P40 | tccatfttatagattftftftaaatattggatftftaaataaagcgtt          | marker-free strain BBgaB construction          |
| P41 | attftaaatgtcaaatattftftftaaatattftaaatgggatcttgagaagt     | marker-free strain WBSBgaB construction        |
| P42 | actctcaaagatccattftaaatftftftftaaatattgacattfttaaat       | marker-free strain WBSBgaB construction        |
| P43 | gcaacatgtctgcgcaggctgcagcaccgcaggtgcgcac                  | Amplification of <i>mpd</i> gene               |
| P44 | tgactattctcagataaagttcatcatcacttgggggtga                  | Amplification of <i>mpd</i> gene               |
| P45 | acatgtctgcgcaggctaccgaactcatcttggacttc                    | Amplification of <i>chd</i> gene               |
| P46 | ctagtaacatctgaccgagtcaaggcctggctgcgaga                    | Amplification of <i>chd</i> gene               |
| P47 | gtttgacaaaggtagaacgtatgagaagcaaaaaattgtg                  | <i>aprE</i> signal peptide fused to <i>mpd</i> |
| P48 | gtgcgcacctgcggctgctgcagcctgcgcagacatgttgc                 | <i>aprE</i> signal peptide fused to <i>mpd</i> |
| P49 | gtttgacaaaggtagaacgtatgagaagcaaaaaattgtg                  | <i>aprE</i> signal peptide fused to <i>chd</i> |
| P50 | gaagtccaagatgagttcggtagcctgcgcagacatgt                    | <i>aprE</i> signal peptide fused to <i>chd</i> |
| P51 | gtttgacaaaggtagaacgtatgtcaaaaggagaagaact                  | marker-free strain WBGFP construction          |
| P52 | tatggacgaactfttaataaagtgttaccctataagttaggagc              | marker-free strain WBGFP construction          |

---

---

|     |                                                    |                                        |
|-----|----------------------------------------------------|----------------------------------------|
| P53 | tgttgacaaaggtagaacgtatgtcaaaaggagaagaact           | marker-free strain WBSGFP construction |
| P54 | ggtatggacgaactttataataagtgtaccctataagttaggagc      | marker-free strain WBSGFP construction |
| P55 | cacaatTTTTgcttctcatacgttctacctttgtcaaac            | marker-free strain WBSMPH construction |
| P56 | tcaacccaagtgatgatgaactttatctgagaatagtc             | marker-free strain WBSMPH construction |
| P57 | caatTTTTgcttctcatacgttctacctttgtcaaa               | marker-free strain WBSChd construction |
| P58 | tctcgagccaggcctgaactttatctgagaatagtc               | marker-free strain WBSChd construction |
| P59 | agggaagtacacagttagg                                | Construction of strain WBSBgaBH        |
| P60 | cgataacctagtgggtgggtgggtgaacctcccggcttcac          | Construction of strain WBSBgaBH        |
| P61 | aaggtcaccaccaccaccactaggtatcgatttcgctcgtg          | Construction of strain WBSBgaBH        |
| P62 | ctccaaatatagctgaaccgttcgtataatgtatgct              | Construction of strain WBSBgaBH        |
| P63 | atacattatacgaacgggtcaagctatattggagttg              | Construction of strain WBSBgaBH        |
| P64 | caggcatcgtggtgca                                   | Construction of strain WBSBgaBH        |
| P65 | cctttctctactgttctgta                               | Construction of strain WBSGFPH         |
| P66 | taacactagtgggtgggtgggtggtttataaagtcgtccatacc       | Construction of strain WBSGFPH         |
| P67 | ctttataaacaccaccaccaccactaagttaccctataagttaggagc   | Construction of strain WBSGFPH         |
| P68 | gctgagattcggccagg                                  | Construction of strain WBSGFPH         |
| P69 | gattgggatgatagcgg                                  | Construction of strain WBSMPHH         |
| P70 | catgggatcttgagaagttgatcctaagaatgaatacaggat         | Construction of strain WBSMPHH         |
| P71 | gtattactattcttagatcaacttctcaagatcccatgtg           | Construction of strain WBSMPHH         |
| P72 | ttcatcatcagtggtgggtgggtggtgcttgggggtgacgaccg       | Construction of strain WBSMPHH         |
| P73 | caacccaagcaccaccaccaccactgatgatgaactttatctgagaatag | Construction of strain WBSMPHH         |
| P74 | ccttccagggtatgtttct                                | Construction of strain WBSMPHH         |
| P75 | gattgggatgatagcgggagcat                            | Construction of strain WBSChdH         |
| P76 | ataaagttcagtggtgggtgggtggtgaggcctggctgcgagatc      | Construction of strain WBSChdH         |
| P77 | caggcctcaccaccaccaccactgaactttatctgagaatagtc       | Construction of strain WBSChdH         |
| P78 | ccttccagggtatgtttcttcttgat                         | Construction of strain WBSChdH         |

---

Table S2 the parameters in the kinetics of bacterial growth

| Strains                         | Parameters <sup>a</sup> |                |                |                |
|---------------------------------|-------------------------|----------------|----------------|----------------|
|                                 | X <sub>0</sub>          | X <sub>m</sub> | μ <sub>m</sub> | R <sup>2</sup> |
| <b>Intracellular expression</b> |                         |                |                |                |
| WB800                           | 4.85383                 | 7.66359        | 0.59551        | 0.99996        |
| WBBgaB                          | 4.84786                 | 7.64975        | 0.55991        | 0.99964        |
| 35BgaB                          | 4.86995                 | 7.57226        | 0.46163        | 0.99771        |
| 10BgaB                          | 4.87265                 | 7.56569        | 0.46017        | 0.9968         |
| 3510BgaB                        | 4.81805                 | 7.63049        | 0.53233        | 0.99361        |
| 351022BgaB                      | 4.77512                 | 7.6415         | 0.44152        | 0.98399        |
| 351016BgaB                      | 4.77512                 | 7.6415         | 0.44152        | 0.98399        |
| OBgaB                           | 4.86631                 | 7.59167        | 0.50105        | 0.99897        |
| JBgaB                           | 4.86913                 | 7.61232        | 0.53241        | 0.99901        |
| DBgaB                           | 4.84192                 | 7.60168        | 0.45503        | 0.99937        |
| BBgaB                           | 4.86301                 | 7.58496        | 0.53900        | 0.99956        |
| NPBgaB                          | 4.86263                 | 7.58538        | 0.55051        | 0.9992         |
| WBSBgaB                         | 4.86301                 | 7.58496        | 0.53900        | 0.99956        |
| <b>Extracellular expression</b> |                         |                |                |                |
| WB800                           | 4.81759                 | 8.06541        | 0.51417        | 0.97395        |
| WBSMPH                          | 4.77897                 | 8.04185        | 0.48726        | 0.96098        |
| WBSChd                          | 4.77897                 | 8.04185        | 0.48726        | 0.96098        |

<sup>a</sup> X is the biomass concentration (log<sub>10</sub> CFU/ml); X<sub>0</sub> is the initial cell concentration; X<sub>m</sub> is the maximum cell concentration; μ<sub>m</sub> is the maximum specific growth rate (h<sup>-1</sup>); R<sup>2</sup> is correlation coefficients.

Table S3 the parameters in the kinetics of BgaB production

| Strains | Parameters <sup>a</sup> |           |          |         |
|---------|-------------------------|-----------|----------|---------|
|         | $P_0$                   | $\alpha$  | $\beta$  | $R^2$   |
| WBBgaB  | -27.4086                | -36.31947 | 1.63177  | 0.78631 |
| WBSBgaB | -248.573                | -146.9144 | 75.76605 | 0.89093 |

<sup>a</sup>  $P$  is the activity of enzyme (U, U/ml or U/L).  $P_0$  is the initial activity of enzyme;  $\alpha$  is the constant for enzyme accumulation decided by the cell growth rate;  $\beta$  is the constant for enzyme accumulation decided by the cell concentration.  $R^2$  is correlation coefficients.

#### References:

1. Phisalaphong M, Srirattana N, Tanthapanichakoon W. Mathematical modeling to investigate temperature effect on kinetic parameters of ethanol fermentation. *Biochem Eng J.* 2006; 28:36-43.
2. Luedeking R, Piret EL. A kinetic study of the lactic acid fermentation. Batch process at controlled pH. *BIOTECHNOL BIOENG.* 2000; 67:636-644.
